# Supplementary material
Source: PubMed Central journal article supplement (PMC2685728)

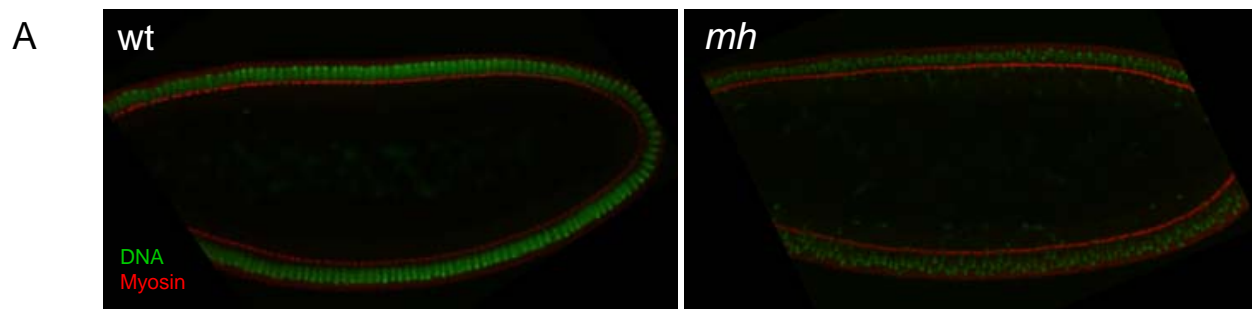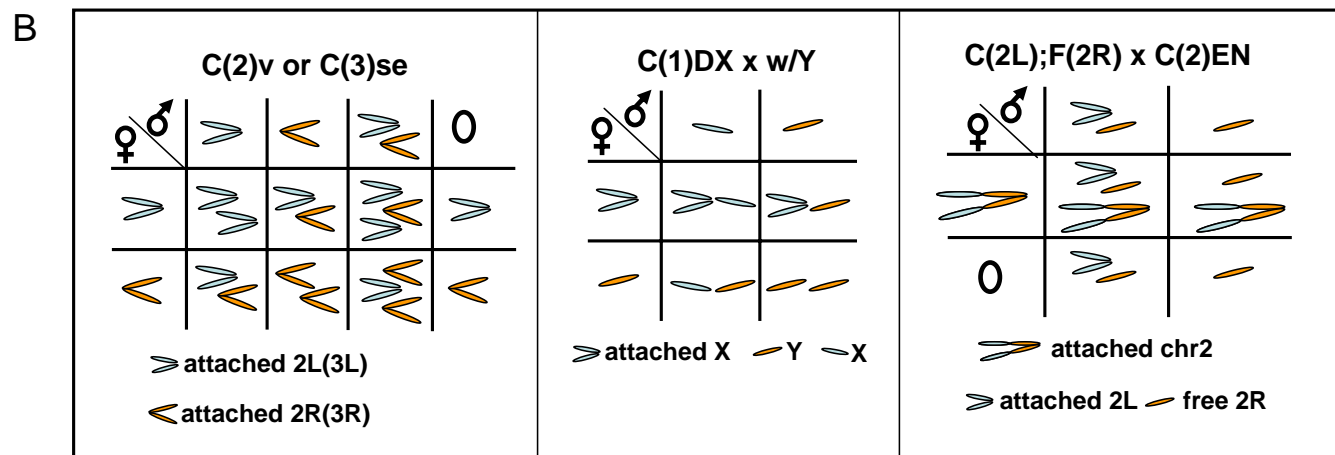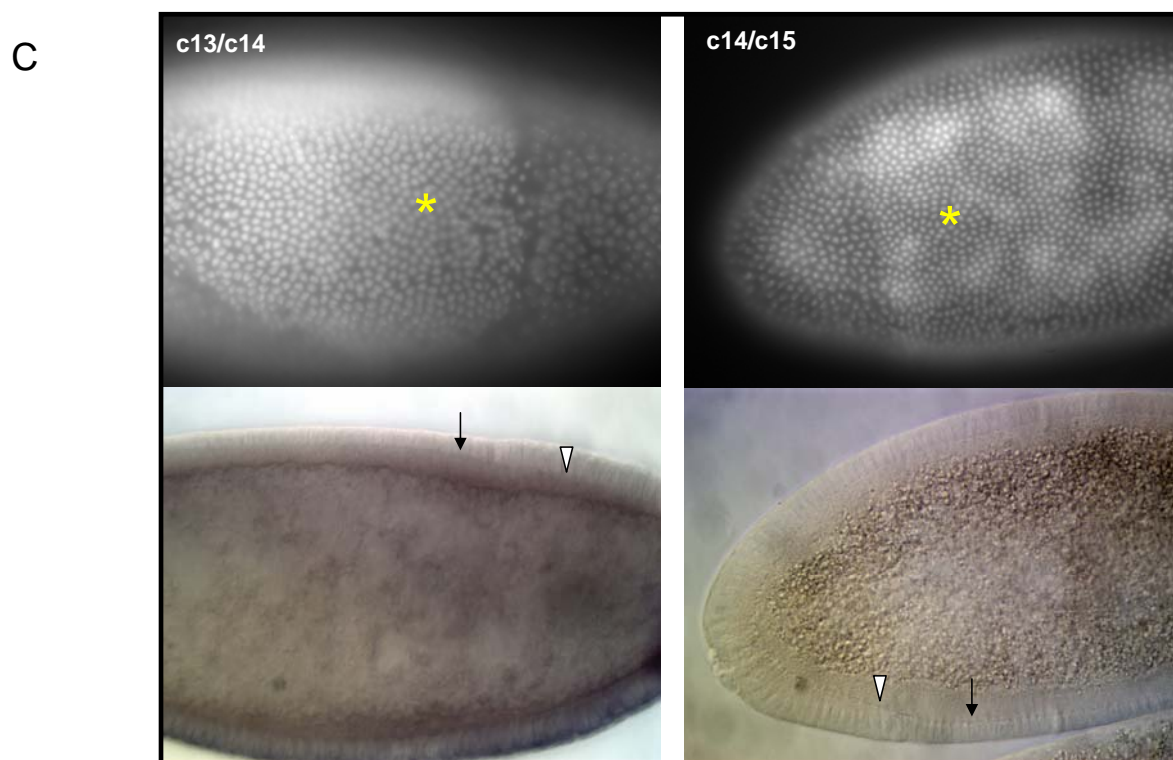

Supplement: supp_136_12_2101__1.pdf [file supp_136_12_2101__1.pdf]
